# Supplementary material for: MicroRNAs as Predictors of Lung-Cancer Resistance and Sensitivity to Cisplatin
Source: MDPI journal article supplement (doi:10.3390/ijms23147594), 2022-07-08
Supplement: s1 [file s1]

**Table S1.** miRNAs associated with DDP resistance. Their downstream targets, expression in DDP-resistant vs DDP-sensitive samples, the effect of miRNA pressure on DDP-resistance parameters.

| No. | DDP-R miRNA | Downstream regulated target   |                                                 | ↑ in DDP resistant vs DDP sensitive samples | ↑ of miRNA expression                   | ↓ of miRNA expression                                                             | Model: resistant, sensitive cells; xenografts | Reference |
|-----|-------------|-------------------------------|-------------------------------------------------|---------------------------------------------|-----------------------------------------|-----------------------------------------------------------------------------------|-----------------------------------------------|-----------|
|     |             | gene, main function/path way) | methods                                         |                                             |                                         |                                                                                   |                                               |           |
| 1   | miR-10a     | PIK3CA, apoptosis             | luciferase reporter assay, Western blot         |                                             | ↑ IC50 in S                             |                                                                                   | S: A549, H1299                                | [109]     |
|     |             | MDR1, TGF βR1                 | ELISA assay                                     | cells                                       |                                         | ↓ drug efflux, ↑ apoptosis in R                                                   | S: A549; R: A549/DDP                          | [110]     |
| 2   | miR-10b     | p-53, apoptosis               | luciferase reporter assay, RT-PCR, Western blot |                                             | ↑ proliferation, colony formation in S  |                                                                                   | S: A549                                       | [111]     |
| 3   | miR-15b     | GSK-3β, apoptosis             | luciferase reporter assay, RT-PCR, Western blot | cells                                       | ↑ cell viability, IC50 apoptosis in S   | ↓ cell viability, IC50 ↑ apoptosis in R                                           | S: PC9-R, A549-R; R: PC9-R, A549-R            | [112]     |
| 4   | miR-18a     | IRF-2                         | luciferase reporter assay, Western blot         | tissues, cells                              |                                         |                                                                                   | S: H226, A549; R: H226/DDP, A549/DDP          | [113]     |
| 5   | miR-19a     | PTEN                          | luciferase reporter assay                       | cells                                       |                                         |                                                                                   | S: H460, A549; R: H460/DDP, A549/DDP          | [114]     |
| 6   | miR-21      | PTEN                          | luciferase reporter assay, Western blot         |                                             | ↑ IC50, ↓ DDP-induced apoptosis in S    | ↓ IC50, ↑ apoptosis in S                                                          | S: A549                                       | [55]      |
|     |             |                               |                                                 |                                             |                                         | ↓ cell viability in S                                                             | S: H460, H157                                 | [56]      |
|     |             |                               |                                                 |                                             | ↑ cell viability, colony formation in R | ↓ cell viability, colony formation, ↑ apoptosis in S, ↓ tumor volume, weight in X | S: A549; R: SK-MES-1; X: A549                 | [57]      |

|    |            |                        |                                                    |                         |                                                                                            |                                                             |                                                       |       |
|----|------------|------------------------|----------------------------------------------------|-------------------------|--------------------------------------------------------------------------------------------|-------------------------------------------------------------|-------------------------------------------------------|-------|
|    |            | HBP1                   | luciferase reporter assay, Western blot            |                         | ↑ migration, invasion, EMT in S                                                            | ↓ migration, invasion, cell viability, EMT markers EMT in R | S: A549;<br>R: A549/DDP                               | [58]  |
| 7  | miR-23a    | PTEN, Akt              | Western blot                                       |                         |                                                                                            | ↑ apoptosis in S                                            | S: A549, NCI-H446                                     | [115] |
| 8  | miR-26b    | PTEN                   |                                                    |                         | ↑ cell viability, migration in S                                                           |                                                             | S: H1299, A549                                        | [116] |
| 9  | miR-27a,b  |                        |                                                    | cells                   |                                                                                            |                                                             | S: A549;<br>R: A549/DDP                               | [59]  |
| 10 | miR-27a    | RKIP, EMT              | luciferase reporter assay, Western blot            | tissues, cells          | ↑ IC50, proliferation, EMT in S, R, ↑ lung metastasis in XS                                | ↓ IC50, proliferation, EMT in S, R, ↓ lung metastasis in XR | S: A549;<br>R: A549/DDP;<br>XS: A549;<br>XR: A549/DDP | [60]  |
| 11 | miR-29     |                        |                                                    | cells                   |                                                                                            |                                                             | S: A549;<br>R: A549/DDP                               | [59]  |
| 12 | miR-31     | ABCB9                  | luciferase reporter assay, RT-PCR and Western blot | cells                   | ↑ cell viability, ↓ DDP-induced apoptosis in S, R                                          | ↓ cell viability, ↑ DDP-induced apoptosis in S, R           | R: NCI-H1299;<br>S: SPC-A-1;<br>X: A549               | [117] |
|    |            |                        |                                                    | cells                   |                                                                                            |                                                             | S: A549;<br>R: A549/DDP                               | [59]  |
| 13 | miR-33b-3p | P21                    | luciferase reporter assay, RT-PCR and Western blot |                         | ↑ cell viability, proliferation, promoted G1/S transition, DNA damage response             | ↓ cell viability, G1 arrest                                 | S: A549;<br>R: A549/DDP                               | [30]  |
| 14 | miR-34a    |                        |                                                    | cells                   |                                                                                            |                                                             | S: A549;<br>R: A549/DDP                               | [118] |
| 15 | miR-92b    | PTEN                   | luciferase reporter assay, RT-PCR, Western blot    | cells                   | ↑IC50 in S                                                                                 | ↓ IC50, ↑ apoptosis in R                                    | S: A549;<br>R: A549/CDDP                              | [61]  |
| 16 | miR-92b-3p | PTEN, PTEN/AKT pathway | luciferase reporter assay, RT-PCR, Western blot    | plasma exosomes, plasma | ↑ IC50 in SBC-3, ↓ apoptosis in S, ↑ tumor volume, exosomal miR-92b-3p ↑ tumor volume in X | ↑ apoptosis in SBC-3, ↓ tumor volume in X                   | S: SBC-3, SHP77;<br>X: SBC-3                          | [23]  |

|    |             |                             |                                                                                                  |                |                                                                      |                                                                         |                                                   |       |
|----|-------------|-----------------------------|--------------------------------------------------------------------------------------------------|----------------|----------------------------------------------------------------------|-------------------------------------------------------------------------|---------------------------------------------------|-------|
| 17 | miR-96      | LMO7 (actin cytoskeleton)   | luciferase reporter assay, Western blot                                                          |                |                                                                      | ↓ cell viability, ↑apoptosis                                            | S: A549                                           | [119] |
| 18 | miR-98      |                             |                                                                                                  |                |                                                                      | ↓ cell viability, ↑ apoptosis in S                                      | S: A549, NCI-H460                                 | [120] |
| 19 | miR-103a-3p | NF1 (ERK signaling pathway) |                                                                                                  | tissues, cells | ↑ cell viability in S                                                |                                                                         | S: A549, PC-9                                     | [121] |
|    |             |                             |                                                                                                  | cells          |                                                                      |                                                                         | S: A549;<br>R: A549/DDP                           | [59]  |
| 20 | Exo-103a-3p | Bak1, apoptosis             | luciferase reporter assay, RT-PCR                                                                |                | ↑ cell viability ↓ apoptosis in S, ↑ tumor volume, ↓ apoptosis in X  |                                                                         | S: H1650, H1299;<br>X: H1650                      | [122] |
| 21 | miR-106a    | ABCA1                       | luciferase reporter assay, RT-PCR                                                                | cells          | ↑ cell viability in S                                                | ↓ cell viability in R                                                   | S: A549;<br>R: A549/DDP                           | [123] |
| 22 | miR-107     |                             |                                                                                                  | cells          |                                                                      |                                                                         | S: A549;<br>R: A549/DDP                           | [59]  |
| 23 | miR-130b    | PTEN, Wnt/β-catenin         | luciferase reporter assay, RT-PCR and Western blot                                               | cells          | ↑ cell viability, ↓ apoptosis in S, ↑ tumor volume, ↓ apoptosis in X | ↓ cell viability, ↑ apoptosis in R, S, ↓ tumor volume, ↑ apoptosis in X | S: A549, H446;<br>R: A549/CR, H446/CR;<br>X: A549 | [124] |
| 24 | miR-141     | PDCD4                       | luciferase reporter assay, RT-PCR and Western blot                                               | cells          |                                                                      | ↓ cell viability, IC50, ↑ apoptosis in R                                | S: A549;<br>R: A549/DDP                           | [125] |
| 25 | miR-145     | CDK6, cell cycle            | Western blot, RT-PCR                                                                             | cells          |                                                                      |                                                                         | S: Calu6<br>R: Calu6 cisplatin-resistant sublines | [126] |
| 26 | miR-146a    | CHOP, DNA reparation        | luciferase reporter assay, RT-PCR Immunoblotting, Immunohistochemical staining of X tumor tissue | tissues, cells | ↑ IC50 in A549, H446, ↑ tumor volume in X                            | reduction in cisplatin IC50 in A549/CDDP and H446/CDDP cells            | S: A549, H446, H165;<br>R: A549/CDDP, H446/CDDP   | [54]  |
| 27 | miR-149     |                             |                                                                                                  | cells          |                                                                      |                                                                         | S: A549;                                          | [118] |

|    |          |                                     |                                         |       |                                                                                           |                                                                                                                                                                            |                                                                 |       |
|----|----------|-------------------------------------|-----------------------------------------|-------|-------------------------------------------------------------------------------------------|----------------------------------------------------------------------------------------------------------------------------------------------------------------------------|-----------------------------------------------------------------|-------|
|    |          |                                     |                                         |       |                                                                                           |                                                                                                                                                                            | R: A549/DDP                                                     |       |
| 28 | miR-155  | TP53                                | luciferase reporter assay, Western blot |       | ↑ proliferation, ↑ colony formation in S, ↑ proliferation, angiogenesis, ↓ apoptosis in X | ↓ viability proliferation, angiogenesis, ↑ apoptosis in S, ↓ proliferation, angiogenesis, ↑ apoptosis ↓ number of tumors, tumor size and aggregate mass of metastases in X | S: A549;<br>X: A549-LVEV                                        | [127] |
|    |          | Apaf-1, apoptosis                   | RT-PCR, Western blot                    |       | ↓ apoptosis in S                                                                          |                                                                                                                                                                            | S: A549                                                         | [128] |
| 29 | miR-181a | PTEN                                | luciferase assay, Western blot          | cells | ↑ migration, invasion, EMT in S                                                           | ↓ migration, invasion, EMT in R                                                                                                                                            | S: A549;<br>R: A549/PTX,<br>A549/DDP                            | [34]  |
|    |          |                                     |                                         | cells |                                                                                           |                                                                                                                                                                            | S: A549;<br>R: A549/DDP                                         | [118] |
| 30 | miR-181c | WIF1, Wnt/ $\beta$ -catenin pathway | luciferase assay, RT-PCR                |       |                                                                                           | ↓ IC <sub>50</sub> , ↑ apoptosis in R,<br>↓ tumor volume in X                                                                                                              | S: A549, H1299;<br>R: A549/CDDP,<br>H1299/CDDP;<br>X: A549/CDDP | [129] |
| 31 | miR-182  | PDCD4, apoptosis                    | RT-PCR, Western blot                    |       |                                                                                           | ↓ cell viability in S                                                                                                                                                      | S: A549                                                         | [130] |
|    |          |                                     |                                         | cells |                                                                                           |                                                                                                                                                                            | S: A549;<br>R: A549/DDP                                         | [59]  |
| 32 | miR-183  |                                     |                                         | cells |                                                                                           |                                                                                                                                                                            | S: A549;<br>R: A549/DDP                                         | [59]  |
| 33 | miR-192  | Bim                                 | luciferase assay, RT-PCR, Western blot  |       | ↑ IC <sub>50</sub> value, ↓ DDP-induced apoptosis in S, R                                 | ↓ IC <sub>50</sub> value, ↑ DDP-induced apoptosis in S, R                                                                                                                  | S: A549;<br>R: A549/DDP                                         | [131] |
| 34 | miR-196a | MDR1, MRP1, ERCC1,                  | Western blot                            | Cells |                                                                                           | ↓ IC <sub>50</sub> value, proliferation, colony formation,                                                                                                                 | S: A549;<br>R: A549/DDP                                         | [132] |

|    |            |                                                                                   |                                                                                                        |                       |                                                                                                                                                  |                                                                                                                              |                                                                           |       |
|----|------------|-----------------------------------------------------------------------------------|--------------------------------------------------------------------------------------------------------|-----------------------|--------------------------------------------------------------------------------------------------------------------------------------------------|------------------------------------------------------------------------------------------------------------------------------|---------------------------------------------------------------------------|-------|
|    |            | survivin, and Bcl-2                                                               |                                                                                                        |                       |                                                                                                                                                  | ↑ inhibitory rate, late-stage apoptosis in R                                                                                 |                                                                           |       |
| 35 | miR-197    |                                                                                   |                                                                                                        | cells, cells exosomes |                                                                                                                                                  |                                                                                                                              | S: A549                                                                   | [25]  |
| 36 | miR-197-3p | p120 catenin, EMT                                                                 | luciferase assay, qRT-PCR, Western blot                                                                |                       | ↑ viability and proliferation, ↓ apoptosis in S, ↑ tumor volume, weight in X                                                                     | ↓ viability and proliferation, ↑ apoptosis in S, ↓ tumor volume, weight in X                                                 | S: A549, H1299, H460, SPC-A-1; X: A549                                    | [133] |
| 37 | miR-221    | PTEN                                                                              | qRT-PCR, Western blot                                                                                  | cells                 | ↑ viability, proliferation in S, R                                                                                                               | ↓ viability, proliferation, ↑ cell senescence in S, R                                                                        | S: A549; R: A549 /DDP                                                     | [134] |
|    |            | PTEN                                                                              | luciferase assay, Western blot                                                                         | tissues               | ↑ colony formation, migration, invasion, ↓ cell arrest in G <sub>0</sub> /G <sub>1</sub> , ↓ apoptosis in R                                      |                                                                                                                              | R: SPC-A1/DDP, H520/DDP                                                   | [135] |
|    |            |                                                                                   |                                                                                                        | cells                 |                                                                                                                                                  |                                                                                                                              | S: A549; R: A549/DDP                                                      | [59]  |
| 38 | miR-222    |                                                                                   |                                                                                                        | cells                 |                                                                                                                                                  |                                                                                                                              |                                                                           |       |
| 39 | miR-224    | p21 <sup>WAF1/CIP1</sup> , G(1)/S transition, apoptosis                           | luciferase assay, qRT-PCR, Western blot in LA cells, xenografts, qRT-PCR, immunostaining of LA tissues | tissues, cells        | ↑ colony formation, ↑IC <sub>50</sub> value, ↓ cell arrest in G <sub>0</sub> /G <sub>1</sub> , ↓ DDP-induced apoptosis in S, ↑ tumor volume in X | ↓ colony formation, ↓ IC <sub>50</sub> value, ↑ cell arrest in G <sub>0</sub> /G <sub>1</sub> , ↑ DDP-induced apoptosis in R | R: A549/DDP, SPC-A1/DDP; S: A549, SPC-A1; X: A549                         | [62]  |
| 40 | miR-324-5p | FBXO11, tumor suppressor, cell cycle progression, DNA replication, cell apoptosis | luciferase assay, qRT-PCR, Western blot                                                                | tissues, cells        | ↑ IC <sub>50</sub> value, colony formation, ↓ apoptosis in S, ↑ tumor weight, proliferation, ↓ apoptosis in X                                    | ↓ IC <sub>50</sub> value, colony formation, ↑ apoptosis in R                                                                 | S: A549, SPC-A1; R: A549/CDDP, SPC-A1/CDDP; X: patient-derived xenografts | [63]  |

|    |             |                                          |                                                  |                       |                                                                                                      |                                                                                  |                                                      |       |
|----|-------------|------------------------------------------|--------------------------------------------------|-----------------------|------------------------------------------------------------------------------------------------------|----------------------------------------------------------------------------------|------------------------------------------------------|-------|
| 41 | miR-328     | PTEN                                     | luciferase assay, qRT-PCR                        | tissues, cells        |                                                                                                      | ↓ proliferation, ↑ apoptosis in R                                                | S: A549;<br>R: A549/DDP                              | [136] |
| 42 | miR-369-3p  | SLC35F5                                  | luciferase assay, qRT-PCR, Western blot          | tissues               | ↑ proliferation, invasion, ↓ apoptosis in S                                                          | ↓ proliferation, invasion; ↑ apoptosis in R                                      | S: A549;<br>R: A549/DDP                              | [137] |
| 43 | miR-424-3p  | PTEN                                     | luciferase assay, Western blot                   |                       |                                                                                                      | ↓ cell viability, IC50, colony formation, ↑ apoptosis in S                       | S: A549, H460                                        | [138] |
| 44 | miR-425-3p  | AKT1, autophagy                          | luciferase assay, qRT-PCR, Western blot          | cells, cells exosomes | ↑ cell viability, ↓ apoptosis in S                                                                   | ↓ cell viability, ↑ apoptosis in R                                               | S: A549;<br>R: A549/DDP                              | [26]  |
| 45 | miRNA-488   | eIF3a, NER signaling, DNA repair ability | luciferase reporter assay, qRT-PCR, Western blot | cells                 | ↑ IC50, cell viability, ↓ apoptosis in S, R                                                          |                                                                                  | S: A549;<br>R: A549/DDP                              | [53]  |
| 46 | miR-630     |                                          |                                                  | cells                 | ↑ cell viability, percentage of cells in G <sub>0</sub> -G <sub>1</sub> , ↓ DNA-damage response in S | no effect                                                                        | S: A549                                              | [139] |
| 47 | miR-638     |                                          |                                                  | cells                 |                                                                                                      |                                                                                  | S: A549;<br>R: A549/DDP                              | [118] |
| 48 | miR-663     |                                          |                                                  | cells                 |                                                                                                      |                                                                                  | S: A549;<br>R: A549/DDP                              | [118] |
| 49 | miR-642a-3p |                                          |                                                  | cells, cells exosomes |                                                                                                      |                                                                                  | S: A549                                              | [25]  |
| 50 | miR-1228    |                                          |                                                  | cells                 |                                                                                                      |                                                                                  | S: A549;<br>R: A549/DDP                              | [118] |
| 51 | miR-1246    |                                          |                                                  | cells                 |                                                                                                      |                                                                                  | S: A549;<br>R: A549/DDP                              | [118] |
| 52 | miR-1269b   | PTEN, PI3K/AKT signaling pathway         | luciferase assay, qRT-PCR, Western blot          | tissues, cells        | ↑ IC50, cell viability proliferation, ↓ apoptosis in S, R, ↑ tumor growth in SX                      | ↓ IC50, cell viability, proliferation, ↑ apoptosis in S, R, ↓ tumor growth in RX | S: A549;<br>R: A549/DDP;<br>SX: A549<br>RX: A549/DDP | [64]  |
| 53 | miR-1469    |                                          |                                                  | cells                 |                                                                                                      |                                                                                  | S: A549;<br>R: A549/DDP                              | [59]  |

|    |                                                                                                        |                                     |                                               |                  |                                                                          |                                                |                                              |       |
|----|--------------------------------------------------------------------------------------------------------|-------------------------------------|-----------------------------------------------|------------------|--------------------------------------------------------------------------|------------------------------------------------|----------------------------------------------|-------|
| 54 | miR-1470                                                                                               |                                     |                                               | cells            |                                                                          |                                                | S: A549;<br>R: A549/DDP                      | [118] |
| 55 | miR-1908                                                                                               |                                     |                                               | cells            |                                                                          |                                                | S: A549;<br>R: A549/DDP                      | [118] |
| 56 | miR-3172                                                                                               |                                     |                                               | cells            |                                                                          |                                                | S: A549;<br>R: A549/DDP                      | [59]  |
| 57 | miR-4281                                                                                               |                                     |                                               | cells            |                                                                          |                                                | S: A549;<br>R: A549/DDP                      | [59]  |
| 58 | miR-5100                                                                                               | RAB6,<br>mitochondrial<br>apoptosis | luciferase assay,<br>qRT-PCR,<br>Western blot | CSC cells        | ↑ IC50, CSC properties,<br>sphere-formation ability, ↓<br>apoptosis in S | ↓ IC50, CSC<br>properties, ↑<br>apoptosis in S | S: A549, H1299<br>CD44+CD133+ A549,<br>H1299 | [140] |
| 59 | miR-297,<br>let-7d-3p,<br>miR-<br>200b-3p,<br>miR-<br>3065-5p,<br>miR-338-<br>3p and<br>miR-30e-<br>3p |                                     |                                               | cell<br>exosomes |                                                                          |                                                | S: A549                                      | [27]  |

DDP–cisplatin; DDP-R miRNA–miRNA associated with DDP resistance; R–chemotherapy-resistant cell line; S–chemotherapy-sensitive cell line; X–mice xenograft based on LC cell lines

**Table S2.** miRNAs associated with DDP sensitivity: their downstream targets, miRNAs expression in DDP-resistant vs DDP-sensitive samples, the effect of miRNA pressure on DDP-resistance parameters.

| No. | DDP-S miRNA                                                           | Negatively regulated target     |                                                      | ↓ in DDP resistant vs DDP sensitive samples | ↑ of miRNA expression                            | ↓ of miRNA expression | Model: resistant, sensitive cells, xenografts | Reference |
|-----|-----------------------------------------------------------------------|---------------------------------|------------------------------------------------------|---------------------------------------------|--------------------------------------------------|-----------------------|-----------------------------------------------|-----------|
|     |                                                                       | gene, function/path way         | methods                                              |                                             |                                                  |                       |                                               |           |
| 1   | Let7 (let-7a, let-7b, let-7c, let-7d, let-7e, let-7f, let-7g, let-7i) | LIN28A, B                       | luciferase reporter assay, IHC, RT-PCR, Western blot | tissues, cells                              | ↓ cell viability in R                            | ↑ cell viability in S | S: A549<br>R: A549/DDP                        | [31]      |
| 2   | Let7f miR-29a                                                         |                                 | luciferase reporter assay, Western blot              |                                             | ↓ cell viability in S                            |                       | S: H2030                                      | [36]      |
| 3   | miR-let7i-5p                                                          |                                 |                                                      | cells, cells exosomes                       |                                                  |                       | S: A549                                       | [25]      |
| 4   | miR-1                                                                 | ATG3                            | luciferase reporter assay, Western blot              | tissues, cells                              | ↓ IC <sub>50</sub> , autophagy, ↑ apoptosis in R |                       | S: A549, H1299<br>R: A549/DDP, H1299/DDP      | [141]     |
| 5   | miR-7                                                                 | MRP1/ABCC1, drug transportation | luciferase reporter assay, IHC, RT-PCR, Western blot | tissue                                      |                                                  |                       |                                               | [142]     |
| 6   | miR-15a-3p                                                            |                                 |                                                      |                                             | ↓ cell viability, ↑ autophagy, apoptosis in S, R |                       | S: Calu1; R: CR-Calu1                         | [143]     |
| 7   | miR-17 (miR-17, miR-20a, b, miR-93,                                   | CDKN1ADNA synthesis             | luciferase reporter assay, RT-PCR, Western blot      | cells                                       | ↓ cell viability, ↑ apoptosis in R               |                       | S: A549;<br>R: A549/DDP                       | [59]      |



|    |              |                                 |                                                 |                       |                                                                                                       |                                                                        |                                                     |       |
|----|--------------|---------------------------------|-------------------------------------------------|-----------------------|-------------------------------------------------------------------------------------------------------|------------------------------------------------------------------------|-----------------------------------------------------|-------|
|    | miR-106a, b) |                                 |                                                 |                       |                                                                                                       |                                                                        |                                                     |       |
| 8  | miR-17       | <i>TGFβR2</i>                   | luciferase reporter assay, RT-PCR, Western blot | cells                 | ↓ cell viability, EMT, migration in R                                                                 | ↑ cell viability, EMT, migration in S                                  | S: A549;<br>R: A549/DDP                             | [59]  |
| 9  | miR20a/b     |                                 |                                                 |                       |                                                                                                       |                                                                        |                                                     |       |
| 10 | miR-26a      | CEACAM6, cell-cell interactions | luciferase reporter assay, Western blot         | tissues, cells        |                                                                                                       |                                                                        | S: A549;<br>R: A549/DDP                             | [71]  |
| 11 | miR-27b-3p   |                                 |                                                 | cells, cells exosomes |                                                                                                       |                                                                        | S: A549                                             | [25]  |
| 12 | miR-27b      | Snail, EMT                      | luciferase reporter assay, RT-PCR, Western blot |                       | ↓ proliferation, migration, EMT in S, ↓ tumor volume, weight in X                                     |                                                                        | S: A549, H1299<br>X: H1299                          | [145] |
|    |              |                                 |                                                 | cells                 |                                                                                                       |                                                                        | S: A549;<br>R: A549/DDP                             | [118] |
| 13 | miR-29c      | AKT2                            | RT-PCR                                          | tissues               | ↓ cell viability in S, ↓ tumor volume, proliferation (ki-67 index and AKT2 in X                       | ↑ cell viability in S                                                  | S: SPC-A-1, A549;<br>X: A549                        | [65]  |
| 14 | miR-29a-3p   |                                 |                                                 | cells, exosomes       |                                                                                                       |                                                                        | S: A549;<br>R: A549/DDP                             | [25]  |
| 15 | miR-29a      | REV3L                           | luciferase reporter assay, RT-PCR, Western blot |                       | ↓ viability in S cells, ↑ apoptosis                                                                   | ↑ viability in S cells                                                 | S: A549, H1650;<br>R: A549/DDP                      | [146] |
| 16 | miR-29a      |                                 |                                                 | cells                 |                                                                                                       |                                                                        | S: A549;<br>R: A549/DDP                             | [71]  |
| 17 | miR-30b-5p   | LRP8                            | luciferase reporter assay, RT-PCR, Western blot | cells                 | ↓ viability, colony formation, migration, and invasion, ↑ apoptosis in S, ↓ tumor weight, volume in X | ↑ viability, colony formation migration and invasion, ↓ apoptosis in S | S: A549, NCI-H1299;<br>R: A549/DDP;<br>X: A549 mice | [66]  |
| 18 | miR-31       |                                 |                                                 | cells                 |                                                                                                       |                                                                        | S: A549;<br>R: A549/DDP                             | [71]  |
| 19 | miR-32       | TRIM29                          |                                                 | plasma                |                                                                                                       |                                                                        |                                                     | [24]  |

|    |                                   |                                |                                                 |                       |                                                                                    |                                                                                    |                                                 |       |
|----|-----------------------------------|--------------------------------|-------------------------------------------------|-----------------------|------------------------------------------------------------------------------------|------------------------------------------------------------------------------------|-------------------------------------------------|-------|
| 20 | miR-34a-5p                        |                                | luciferase reporter assay, Western blot         |                       |                                                                                    | ↑ IC <sub>50</sub> , proliferation, ↓ apoptosis                                    | HCC827, H522                                    | [147] |
| 21 | miR-34c-3p                        | NOTCH                          | luciferase reporter assay, RT-PCR, Western blot | tissues               | ↓ cell viability, migration, ↑ apoptosis in S, ↓ tumor weight in X                 |                                                                                    | S: A549, H1299<br>X: A549 mice                  | [35]  |
| 22 | miR-92 family (miR-92a,b; miR-25) | RAD21 the repair of DNA damage | luciferase reporter assay, RT-PCR, Western blot | cells                 | ↓ cell viability, ↑ apoptosis in R                                                 |                                                                                    | S: A549<br>R: A549/DDP                          | [148] |
| 23 | miR-92b                           |                                |                                                 | cells                 |                                                                                    |                                                                                    | S: A549<br>R: A549/DDP                          | [59]  |
| 24 | miR-93                            |                                |                                                 | cells                 |                                                                                    |                                                                                    | S: A549<br>R: A549/DDP                          | [59]  |
| 25 | miR-96-5p                         |                                |                                                 | cells                 |                                                                                    |                                                                                    | S: A549, H460;<br>R: H460-CisR, A549- CisR      | [149] |
| 26 | miR-98                            | HMGA2                          |                                                 |                       | ↓ cell viability, ↑ apoptosis in S, R                                              |                                                                                    | S: A549;<br>R: A549/DDP                         | [150] |
| 27 | miR-100-5p                        | mTOR                           | luciferase reporter assay, RT-PCR, Western blot | cells, cells exosomes | ↓ IC <sub>50</sub> , ↑ apoptosis in S, R, ↓ tumor volume, weight, ↑ apoptosis in X | ↑ IC <sub>50</sub> , ↓ apoptosis in S, R, ↑ tumor volume, weight, ↓ apoptosis in X | S: A549;<br>R: A549/DDP;<br>X: A549             | [25]  |
| 28 | miR-101                           | ABCC1                          | luciferase reporter assay, RT-PCR, Western blot |                       | ↓ cell viability, IC <sub>50</sub> , colony formation, ↑ apoptosis in S            | ↑ cell viability, IC <sub>50</sub> , migration, invasion, colony formation in S    | S: A549, H1299                                  | [67]  |
|    |                                   | ROCK2, EMT                     | luciferase reporter assay, RT-PCR, Western blot | tissues, cells        | ↓ IC <sub>50</sub> , migration, invasion, EMT, ↑ apoptosis in S, R                 |                                                                                    | S: A549, NCI-H520;<br>R: A549-res, NCI-H520-res | [68]  |
| 29 | miR-103a-3p                       | SOX4                           | luciferase reporter assay, RT-PCR, Western blot | cells                 | ↓ IC <sub>50</sub> in S, R                                                         | ↑ IC <sub>50</sub> in S, R                                                         | S: A549, H1299;<br>R: A549/DDP, H1299 / DDP     | [151] |

|    |              |                           |                                                         |                          |                                                                                                                                                                                   |                                                                                                    |                                           |       |
|----|--------------|---------------------------|---------------------------------------------------------|--------------------------|-----------------------------------------------------------------------------------------------------------------------------------------------------------------------------------|----------------------------------------------------------------------------------------------------|-------------------------------------------|-------|
| 30 | miR-106a     |                           |                                                         | cells                    |                                                                                                                                                                                   |                                                                                                    | S: A549;<br>R: A549/DDP                   | [59]  |
| 31 | miR-106b-5p  | PKD2, drug transportation | luciferase reporter assay, Western blot                 | cells                    | ↓ IC <sub>50</sub> , invasion, ↑ apoptosis, G1 cell-cycle arrest in S, R                                                                                                          |                                                                                                    | S: A549;<br>R: A549/DDP                   | [152] |
| 32 | miR-107      | CDK8                      | RT-PCR, Western blot                                    |                          | ↓ cell viability in S                                                                                                                                                             |                                                                                                    | S: A549;                                  | [153] |
| 33 | miR-124      | STAT3                     | luciferase reporter assay, RT-PCR, Western blot         | cells                    | ↓ proliferation, migration, invasion, ↑ apoptosis in R                                                                                                                            |                                                                                                    | S: A549;<br>R: A549/DDP                   | [154] |
| 34 | miR-125b-5p  |                           |                                                         | cells, cells<br>exosomes |                                                                                                                                                                                   |                                                                                                    | S: A549;<br>R: A549/DDP                   | [25]  |
| 35 | miR-129-1-3p | SOX4                      | luciferase reporter assay, RT-PCR, Western blot         |                          | ↓ IC <sub>50</sub> , colony formation ↑ apoptosis in R cells                                                                                                                      | ↑ IC <sub>50</sub> , colony formation ↓ apoptosis in R cells                                       | R: H446/DDP, A549/DDP                     | [155] |
| 36 | miR-129-5p   | DLK1                      | luciferase reporter assay, Western blot                 |                          | ↓ IC <sub>50</sub> , colony formation ↑ apoptosis                                                                                                                                 |                                                                                                    | S: A549, H460                             | [156] |
| 37 | miR-130a     | SOX4                      | luciferase reporter assay, Western blot                 |                          | ↓ IC <sub>50</sub>                                                                                                                                                                | ↑ IC <sub>50</sub>                                                                                 | S: A549, H1299;<br>R: A549/DDP, H1299/DDP | [151] |
| 38 | miR-133      | GSTP1                     | luciferase reporter assay, RT-PCR, Western blot         | cells                    | ↓ IC <sub>50</sub> , survival, proliferation, colony formation, migration, ↑ apoptosis in S, R                                                                                    |                                                                                                    | S: A549, H1299;<br>R: A549/DDP, H1299/DDP | [157] |
| 39 | 135a/b       | MCL1                      | luciferase reporter assay, Western blot                 | cells                    | ↓ IC <sub>50</sub><br>↑ apoptosis in R                                                                                                                                            | ↑ IC <sub>50</sub> in S                                                                            | S: A549<br>R: A549/DDP                    | [158] |
| 40 | 135b         | FZD1                      | luciferase reporter assay, RT-PCR, Western blot         | cells                    | ↓ IC <sub>50</sub> , proliferation<br>↑ apoptosis in R                                                                                                                            | ↑ IC <sub>50</sub> , proliferation, apoptosis in S                                                 | S: A549<br>R: A549/DDP                    | [159] |
| 41 | miR-137      | NUCKS1, PI3K/AKT          | luciferase reporter assay, immunoblotting, Western blot | tissues, cells           | ↓ cell proliferation, migration, induced cell apoptosis, arrest the cell cycle in G1 phase and reversed drug resistance in R, tumor volume and weight, ↓ VEGF (angiogenesis) in X | ↑ cell growth, migration, cell survival, cell-cycle G1/S transition, resistance (CCK-8 assay) in S | S: A549,<br>R: A549/CDDP<br>X: A549/CDDP  | [37]  |

|    |             |                                 |                                                 |                                      |                                                                                             |                       |                                        |       |
|----|-------------|---------------------------------|-------------------------------------------------|--------------------------------------|---------------------------------------------------------------------------------------------|-----------------------|----------------------------------------|-------|
| 42 | miR-138-5p  | ATG7, autophagy                 | luciferase reporter assay, RT-PCR,              | tissues                              | ↑ apoptosis in S, R                                                                         |                       | S: A549<br>R: A549/DDP                 | [160] |
| 43 | miR-138     |                                 |                                                 | cell exosomes                        | ↓ cell viability in S, R                                                                    |                       | S: A549<br>R: A549/DDP                 | [161] |
|    |             |                                 |                                                 | cell                                 |                                                                                             |                       | S: A549<br>R: A549/DDP                 | [118] |
| 44 | miR-139     | HOXB2                           | luciferase reporter assay, RT-PCR, Western blot |                                      | ↓ cell viability, ↑ apoptosis in S, R                                                       |                       | A549                                   | [161] |
| 45 | miR-140-5p  | Wnt/β-catenin pathway           | RT-PCR, Western blot                            |                                      | ↓ cell proliferation, migration, invasion in R,<br>↓ tumor volume, weight in X              |                       | R: A549/DDP, H1299/DDP;<br>X: A549/DDP | [162] |
| 46 | miR-142     | WEE1                            | luciferase reporter assay, RT-PCR               |                                      | ↓ proliferation, migration, invasion, and autophagy, ↑ apoptosis                            |                       | R: A549/DDP, H1299/DDP                 | [163] |
|    |             | Pd-L1, apoptosis                | luciferase reporter assay, RT-PCR, Western blot | tissues, cells                       | ↓ cell viability, migration, invasion in R                                                  |                       | S: A549;<br>R: A549/DDP                | [164] |
| 47 | miR-144     | Nrf2                            | luciferase reporter assay, RT-PCR, Western blot | tissues                              | ↓ cell viability                                                                            | ↑ cell viability      | S: A549, H1299                         | [165] |
| 48 | miR-145-5p  | ABCC1, drug transportation      | luciferase reporter assay, RT-PCR, Western blot | tissues, cells                       | ↓ IC <sub>50</sub> in R                                                                     |                       | S: A549;<br>R: A549/DDR                | [69]  |
| 49 | miR-146a-5p | ATG12, autophagy                | luciferase reporter assay, Western blot         | cells, cell exosomes, serum exosomes | ↓ cell viability in R                                                                       | ↑ cell viability in S | S: A549;<br>R: A549/DDR                | [166] |
| 50 | miR-146a    | JNK2, apoptosis                 | luciferase reporter assay                       | cells                                | ↓ proliferation, invasion, Bcl-2, ↑ apoptosis, cell-cycle arrest in S, JNK2, P53 expression |                       | S: A549;<br>R: A549/DDR                | [70]  |
| 51 | miR-148b    | CEACAM6, cell-cell interactions | luciferase reporter assay, Western blot         | tissues, cells                       |                                                                                             |                       | S: A549;<br>R: A549/DDR                | [71]  |

|    |                                   |                                            |                                                 |       |                                                                                                                                                                                                          |                                                                          |                                                            |       |
|----|-----------------------------------|--------------------------------------------|-------------------------------------------------|-------|----------------------------------------------------------------------------------------------------------------------------------------------------------------------------------------------------------|--------------------------------------------------------------------------|------------------------------------------------------------|-------|
|    |                                   | CCNJ, cell cycle                           | luciferase reporter assay, RT-PCR, Western blot |       | ↓ cell viability, migration, invasion, ↑ cell-cycle arrest at G0/G1, apoptosis in R, ↓ tumor volume, ↑apoptosis in X                                                                                     |                                                                          | S: A549, SPC-A1<br>R: A549/DDP, SPC-A1/DDP;<br>X: A549/DDP | [72]  |
|    |                                   | ↑ DNMT1                                    | luciferase reporter assay, RT-PCR, Western blot | cells | ↓ cell viability, ↑ apoptosis in S, R                                                                                                                                                                    |                                                                          | S: A549, SPC-A1;<br>R: A549/DDP, SPC-A1/DDP                | [167] |
| 52 | miR-181                           | PTEN, PTEN/PI3K/AKT/mTOR pathway signaling | RT-PCR, Western blot                            |       | ↓ proliferation, ↑ apoptosis, autophagy, PTEN/PI3K/AKT/mTOR pathway in R                                                                                                                                 | ↑ proliferation, ↓ apoptosis, autophagy, PTEN/PI3K/AKT/mTOR pathway in R | S: A549;<br>R: A549/DDP                                    | [75]  |
| 53 | miR-181a                          |                                            |                                                 |       | ↑ percentage of cells in G0-G1, ↑ Bax in S                                                                                                                                                               | No effect                                                                | S: A549                                                    | [139] |
| 54 | miR-181b                          | BCL2 anti-apoptotic                        | luciferase reporter assay, Western blot         | cells | ↓ IC50 enhanced sensitivity to VCR, 5-Fu, CDDP, VP-16 and ADR, but not to MMC, ↑ apoptosis in S                                                                                                          | ↑ IC50 in R                                                              | S: A549;<br>R: A549/CDDP                                   | [73]  |
| 55 | miR-96-5p, miR-182-5p, miR-183-5p | TGFβR1, Smad signaling pathway             | luciferase reporter assay, RT-PCR, Western blot |       | ↓ proliferation, migration, metastatic ability, EMT, cell viability, % cells in the S stage<br>↑ % cells in the G1 stage, apoptosis in S, R, ↓ tumor volume, lung metastasis formation, ↑ apoptosis in X | ↑ cell viability, ↓ apoptosis in S, R                                    | S: A549;<br>R: A549/CDDP;<br>X: A549/DDP nude mice         | [74]  |
|    |                                   | Bcl-2,apoptosis                            | luciferase reporter assay, RT-PCR,              |       | ↓ proliferation, invasion                                                                                                                                                                                |                                                                          | S: H446, H446R                                             | [75]  |
|    |                                   | Notch2                                     | luciferase reporter assay, Western blot         |       | ↓ cell viability, ↑ apoptosis in R, ↓ tumor volume, markers of cancer stemness in X                                                                                                                      | ↑ cell viability, ↓ apoptosis in S                                       | S: A549;<br>R: A549/DDP;<br>X: A549/DDP                    | [76]  |
|    |                                   | GLI2                                       | luciferase assay, Western blot                  | cells | ↓ proliferation in R                                                                                                                                                                                     |                                                                          | R: H460-CisR, A549- CisR                                   | [149] |

|    |                       |                               |                                                 |                |                                                                                                                                                                                                |                                                        |                                                                              |       |
|----|-----------------------|-------------------------------|-------------------------------------------------|----------------|------------------------------------------------------------------------------------------------------------------------------------------------------------------------------------------------|--------------------------------------------------------|------------------------------------------------------------------------------|-------|
| 56 | miR-183-5p            |                               |                                                 | cells          |                                                                                                                                                                                                | ↑ IC50,                                                | S: TL-1;                                                                     | [168] |
| 57 | miR-184               | Bcl-2, apoptosis              | Western blot                                    |                | ↓ IC50, ↑ caspase3 in S, R                                                                                                                                                                     | ↓ caspase3 in S, R                                     | R: TL-10                                                                     |       |
| 58 | miR-185-5p            | ABCC1                         | luciferase reporter assay, RT-PCR, Western blot | cells          | ↓ proliferation, ↑ apoptosis in R                                                                                                                                                              |                                                        | S: A549;<br>R: A549/DDP                                                      | [169] |
| 59 | miR-193               | LRRC1                         | luciferase reporter assay, RT-PCR, Western blot | tissues, cells | ↓ proliferation, invasion, migration, colony formation in S, R, ↓ invasion, migration, ↑ apoptosis in X                                                                                        | ↑ proliferation, invasion, migration, colony formation | S: BEAS-2B, A549, H1299, H358, SPC-A-1;<br>R: A549/DDP;<br>X: A549, A549/DDP | [170] |
| 60 | miR-194               |                               |                                                 | cells          |                                                                                                                                                                                                |                                                        | S: A549;<br>R: A549/DDP                                                      | [118] |
| 61 | miR-196a              | FOXA1, EMT                    | luciferase reporter assay, Western blot         | cells          | ↓ cell viability, proliferation, colony formation, migration, invasion, ↑ apoptosis, cell-cycle arrest in S cells, ↓ IC50, ↑ apoptosis in R, ↓ tumor volume, weight, pulmonary metastases in X |                                                        | S: A549, H1299;<br>R: A549/DDP;<br>X: A549                                   | [171] |
|    |                       |                               |                                                 | cells          |                                                                                                                                                                                                |                                                        | S: A549;<br>R: A549/DDP                                                      | [59]  |
| 62 | miR-200b              |                               |                                                 |                | ↓ IC50, colony formation, ↑ apoptosis and cell-cycle arrest in G2/M phase in S, R, ↓ tumor volume in X                                                                                         | ↑ IC50, colony formation                               | S: SPC-A1, A549;<br>R: SPC-A1/DTX;<br>X: SPC-A1/DTX                          | [158] |
| 63 | miR-200c              |                               |                                                 |                | ↓ cell viability, proliferation invasion, EMT ↑ apoptosis in S, ↓ liver metastasis*                                                                                                            |                                                        | S: H1299, H596, H522                                                         | [38]  |
| 64 | miR-200bc/429 cluster | BCL2 and XIAP, anti-apoptotic | luciferase reporter assay, Western blot         | cells          | ↓ IC50 VCR, CDDP, VP-16, and ADR, but not to 5-Fu, ↑ apoptosis                                                                                                                                 | IC50                                                   | S: A549/CA549;<br>R: A549/CA549/CDDP                                         | [172] |

|    |            |                                              |                                         |                |                                                                                 |                                                    |                                                   |       |
|----|------------|----------------------------------------------|-----------------------------------------|----------------|---------------------------------------------------------------------------------|----------------------------------------------------|---------------------------------------------------|-------|
| 65 | miR-202    | KRas                                         | luciferase reporter assay, Western blot |                | ↓ cell viability, IC50 ↑ apoptosis in S, ↓ tumor volume in X                    |                                                    | S: NCI-H441, A549; X: A549                        | [32]  |
| 66 | miR-202-5p | MDR1                                         | luciferase assay, Western blot          |                |                                                                                 | ↑ proliferation in S, R                            | S: A549; R: A549 /DDP                             | [173] |
| 67 | miR-203    | DKK1                                         | luciferase assay, qRT-PCR, Western blot | tissues        | ↓ IC50, cell proliferation, ↑ apoptosis, in S                                   |                                                    | S: A549, H460                                     | [174] |
| 68 | miR-204    | ZEB2                                         | luciferase assay, Western blot          |                |                                                                                 | ↑ IC50 in S                                        | S: A549, SPCA-1                                   | [175] |
| 69 |            | CAV1, AKT pathway                            | luciferase assay, qRT-PCR, Western blot |                | ↓ IC50, ↑ mitochondrial apoptosis in R, ↓ tumor volume in X                     | ↑ IC50 in S                                        | S: A549, PC9<br>R: CR-A549, CR-PC9;<br>X: CR-A549 | [176] |
| 70 | miR-206    | MET                                          | luciferase assay, Western blot          | tissues, cells | ↓ cell viability, EMT, migration, invasion in R                                 | ↑ cell viability, EMT, migration and invasion in S | S: A549, H1299; R: A549/DDP, H1299/DDP            | [177] |
| 71 | miR-214    | c-Myc, CSCs, EMT                             | luciferase assay, Western blot          |                | ↓ CSCs (cisplatin-enriched CD133+, ALDH+ population, spheroid formation) in S   | ↑ β-catenin, Cyclin E, EZH2, Survivin in S         | S: H460, H1299, A549                              | [178] |
| 72 | miR-216    | Beclin-1, autophagy                          | luciferase assay, Western blot          | cells          | ↑ apoptosis in R                                                                | ↓ apoptosis in S                                   | S: A549; R: A549 /DDP                             | [179] |
| 73 | miR-216b   | c-Jun, c-Jun/Bcl-xl pathway, apoptosis       |                                         |                | ↓ IC50 in S<br>↓ tumor weight in X                                              | ↑ IC50 in S                                        | S: A549, PC9; X: A549                             | [24]  |
| 74 | miR-217    | KRAS                                         | luciferase assay, qRT-PCR, Western blot | cells          | ↓ cell viability in S                                                           | ↑ cell viability in S                              | S: SPC-A-1, A549                                  | [180] |
| 75 | miR-218    | RUNX2, angiogenesis by enhancing endothelial | luciferase assay, Western blot          | cells          | ↓ IC50, G0/S transition, cell invasion, MDR1, BCL-2, CyclinD1, ↑ apoptosis in R |                                                    | S: A549; R: A549/DDP                              | [181] |

|    |              |                                                  |                                                       |                |                                                                                                                   |                                           |                                                            |       |
|----|--------------|--------------------------------------------------|-------------------------------------------------------|----------------|-------------------------------------------------------------------------------------------------------------------|-------------------------------------------|------------------------------------------------------------|-------|
|    |              | cell proliferation, invasion, and tube formation |                                                       |                |                                                                                                                   |                                           |                                                            |       |
| 76 | miR-219a-5p  | FGF-9 proliferation                              | luciferase assay, qRT-PCR, Western blot, IHC staining | tissues, cells | ↓ cell viability, proliferation, colony formation, ↑ cell-cycle arrest at G0/G1 in R, ↓ tumor volume, weight in X |                                           | S: A549, SPC-A1; R: A549-R, SPC-A1-R X: A549, A549-R       | [182] |
| 77 | miR-224      |                                                  |                                                       | cells          |                                                                                                                   |                                           | S: A549; R: A549/DDP                                       | [118] |
| 78 | miR-203      | DKK                                              | luciferase assay, Western blot                        | tissues        | ↓ IC50, ↑ apoptosis in S, ↓ tumor weight in X                                                                     |                                           | S: A549, H460; X: A549, H460                               | [174] |
| 79 | 295-5p       | STAT, EMT                                        | luciferase reporter assay, Western blot               |                |                                                                                                                   | ↓ inhibitory rate, ↑ IC50                 | S: A549, H1650; R: A549/DDP, H1650/DDP                     | [183] |
| 80 | miR-320b,d,e |                                                  |                                                       | cells          |                                                                                                                   |                                           | S: A549; R: A549/DDP                                       | [59]  |
| 81 | miR-324-3p   | GPX4, ferroptosis                                | luciferase assay, qRT-PCR, Western blot               | cells          | ↓ cell viability, colony formation, ↑ apoptosis in R, ↑ ferroptosis in S, R                                       |                                           | S: A549; R: A549/DDP                                       | [184] |
| 82 | miR-377-3p   | GOT1, altered metabolism                         | luciferase reporter assay, Western blot               | cells          | ↓ cell viability, ↑ apoptosis in R                                                                                | ↑ cell viability, ↓ apoptosis in S        | S: A549, H1299, Calu-3; R: A549/DDP, H1299/DDP, Calu-3/DDP | [185] |
| 83 | miR-378      | sCLU                                             | luciferase reporter assay, Western blot               | tissues, cells | ↓ IC50, ↑ apoptosis in R, ↓ tumor volume in X                                                                     |                                           | S: A549, Anip973; R: A549/cDDP, Anip973/cDDP; X: A549/cDDP | [78]  |
| 84 | miR-379      | EIF4G2, the recruitment of mRNA during           | luciferase reporter assay, Western blot               | tissues, cells | ↓ proliferation, colony formation, ↑ apoptosis in R, ↓ tumor volume in RX                                         | ↑ cell proliferation, colony formation, ↓ | H1299 and A549, R6 A549/r X: A549, R6 A549/r               | [79]  |



|    |            |                                                                                                 |                                                                        |                |                                                                                                                                      |                                      |                                      |       |
|----|------------|-------------------------------------------------------------------------------------------------|------------------------------------------------------------------------|----------------|--------------------------------------------------------------------------------------------------------------------------------------|--------------------------------------|--------------------------------------|-------|
|    |            | translational initiation                                                                        |                                                                        |                |                                                                                                                                      | apoptosis in S, ↑ tumor volume in SX |                                      |       |
| 85 | miR-381    | activation of nuclear factor (NF)-κB through repression of inhibitor of differentiation 1 (ID1) | luciferase reporter assay, qRT-PCR, Western blot                       | cells          | ↓ cell viability, colony formation, ↑ cell-cycle arrest at G0/G1 phase in S, ↓ cell viability, ↑ apoptosis in R, ↓ tumor volume in X |                                      | S: A549, NCI-H460; R: A549/DPP       | [80]  |
| 86 | miR-448    | siRNA SATB1                                                                                     | luciferase reporter assay, qRT-PCR, Western blot                       | tissues, cells | ↓ IC50, proliferation in R, ↑ cell-cycle arrest at G0/G1 phase, apoptosis in R, S                                                    | ↑ IC50 in R                          | S: A549; R: A549/DPP                 | [186] |
| 87 | miR-451a   | MCL-1                                                                                           | luciferase reporter assay, qRT-PCR, Western blot                       | Cells          | ↓ IC50 in R, ↓ tumor volume in X                                                                                                     |                                      | S: A549; R: A549/DPP; X: A549        | [81]  |
| 88 | miR-451    | TRIM66                                                                                          | luciferase reporter assay, qRT-PCR, Western blot                       |                | ↓ proliferation, ↑ apoptosis in S, R                                                                                                 |                                      | S: A549, H157; R: A549/DDP, H157/DDP | [82]  |
| 89 |            |                                                                                                 |                                                                        |                | ↓ viability, colony number, ↑ apoptosis in S, ↓ tumor volume in X                                                                    |                                      | S: A549; X: A549                     | [83]  |
| 90 | miR-454    | Stat3                                                                                           | luciferase reporter assay, Western blot                                | cells          | ↓ IC50, ↑ apoptosis                                                                                                                  | ↑ IC50, ↓ apoptosis                  | S: A549, H157;                       | [187] |
| 91 | miR-485    | CD44                                                                                            | luciferase reporter assay, qRT-PCR, Western blot                       | cells          | ↓ stemness in R cells                                                                                                                |                                      | S: A549; R: A549/DDP                 | [188] |
| 92 | miR-486-5p | TWF1, EMT                                                                                       | luciferase reporter assay, qRT-PCR, Western blot, Immunohistochemistry | cells          | ↓ IC50 in S, R, ↓ tumor weight in X                                                                                                  | ↑ IC50 in S, R                       | S: A549; R: A549/DDP; X: A549/DDP    | [84]  |
| 93 | miR-493    | TCRP1 apoptosis                                                                                 |                                                                        |                | ↓ growth, ↑ apoptosis in S, R                                                                                                        |                                      | S: A549 cells R: A549/DDP cells      | [189] |

|     |             |                                                       |                                                  |                |                                                                                                      |                                                                      |                                           |       |
|-----|-------------|-------------------------------------------------------|--------------------------------------------------|----------------|------------------------------------------------------------------------------------------------------|----------------------------------------------------------------------|-------------------------------------------|-------|
| 94  | miR-495     | ATP7A, drug transportation<br>Drug efflux             | luciferase reporter assay, qRT-PCR, Western blot | tissues, cells | ↓ cell viability, intracellular DDP accumulation in S, R                                             | ↑ cell viability, in S, R                                            | S: A549;<br>R: A549/DDP                   | [40]  |
| 95  | miR-497     | BCL2 anti-apoptotic                                   | luciferase reporter assay, Western blot          | cells          | ↓ cell viability VCR, ↑ apoptosis in R                                                               | ↑ cell viability in S                                                | S: A549;<br>R: A549/DDP                   | [41]  |
| 96  | miR-497-5p  | mTOR, apoptosis                                       | luciferase reporter assay, Western blot          |                | ↓ cell viability, IC50 in S                                                                          | ↑ cell viability, IC50, ↓ apoptosis in S                             | S: A549, SK-MES-1                         | [190] |
| 97  | miR-503-3p  | BCL2 anti-apoptotic                                   | luciferase reporter assay                        | cells          | ↓ cell viability ↑ apoptosis in R                                                                    | ↑ cell viability in S                                                | S: A549;<br>R: A549/CDDP                  | [191] |
| 98  | miR-503     |                                                       |                                                  |                | ↓ IC50, ↑ apoptosis in S, R                                                                          | ↑ IC50, ↓ apoptosis in S, R                                          | S: A549;<br>R: A549/CDDP                  | [192] |
| 99  | miR-513a-3p | GSTP1                                                 | luciferase reporter assay, Western blot          | cells          | ↓ IC50 in R                                                                                          | = IC50 in A549                                                       | S: A549, SPCA-1<br>R: A549/CDDP<br>SPCA-1 | [193] |
| 100 | miR-516b-5p | STAT3glycolysis                                       | luciferase reporter assay, qRT-PCR, Western blot |                | ↓ cell viability, glucose consumption and lactic acid formation in S,<br>↓ tumor volume, weight in X |                                                                      | S: A549, H1299;<br>X: A549                | [194] |
| 101 | miR-539     | DCLK1                                                 | luciferase reporter assay, qRT-PCR,              | Cells, tissues | ↓ cell viability, IC50, cell-cycle arrest in G0/G1, invasion, migration, ↑ apoptosis in R            | ↑ cell viability, IC50, cell-cycle arrest in G0/G1, ↓ apoptosis in R | S: A549, H1299;<br>R: A549/DDP, H1299/DDP | [195] |
| 102 | miR-556-3p  | AK4, EMT under hypoxia                                | luciferase reporter assay, qRT-PCR, Western blot |                |                                                                                                      | ↑ proliferation, colony formation, migration, ↓ apoptosis            |                                           | [170] |
| 103 | miR-608     | TEAD2, Hippo-yes-associated protein signaling pathway | luciferase reporter assay, qRT-PCR, Western blot |                | ↓ cell viability, ↑ apoptosis                                                                        | ↑ cell viability                                                     | A549                                      | [196] |

|     |             |                               |                                                  |                                |                                                                                                                                  |  |                                         |       |
|-----|-------------|-------------------------------|--------------------------------------------------|--------------------------------|----------------------------------------------------------------------------------------------------------------------------------|--|-----------------------------------------|-------|
| 104 | miR-613     | GJA1, TBP and EIF-4E          | Western blot                                     | cells                          | ↓ cell viability, exo-miRs: ↓ cell viability, migration ↑ apoptosis, DNA damage in S, R<br>exo-miRs: ↓ tumor volume, weight in X |  | S: A549;<br>R: A549/DDP;<br>X: A549/DDP | [85]  |
| 105 | miR-627-5   | GJA1                          | luciferase reporter assay, Western blot          |                                | ↓ proliferation, migration, colony formation, ↑ apoptosis in S, ↓ tumor volume, weight, Ki67 in X                                |  | S: H1299, A549;<br>X: A549              | [86]  |
|     |             |                               |                                                  | cell exosomes                  |                                                                                                                                  |  | S: A549                                 | [27]  |
| 106 | miR-647     | IGF                           |                                                  |                                |                                                                                                                                  |  |                                         | [197] |
| 107 | miR-886     |                               |                                                  | cells                          |                                                                                                                                  |  | S: A549;<br>R: A549/DDP                 | [118] |
| 108 | miR-1236-3p | TPT1                          | luciferase reporter assay, qRT-PCR, Western blot | cells                          | ↓ proliferation, ↑ apoptosis in S, R                                                                                             |  | S: A549;<br>R: A549/DDP                 | [198] |
| 109 | miR-1244    | Bax, MEF2D, cyclin D1 and p53 | qRT-PCR, Western blot                            |                                | ↓ proliferation, ↑ apoptosis in S                                                                                                |  | S: A549, H522                           | [33]  |
| 110 | miR-1308    |                               |                                                  | cells                          |                                                                                                                                  |  | S: A549;<br>R: A549/DDP                 | [59]  |
| 111 | miR-2861    |                               |                                                  | cells                          |                                                                                                                                  |  | S: A549;<br>R: A549/DDP                 | [59]  |
| 112 | miR-127-3a  | SDCBP (MDA-9), metastasis     | luciferase reporter assay, qRT-PCR, Western blot | cell exosomes, plasma exosomes | ↓ cell viability, ↑ apoptosis                                                                                                    |  | A549                                    | [27]  |

DDP–cisplatin; DDP-S miRNA–miRNA associated with DDP sensitivity; R–chemotherapy-resistant cell line; S–chemotherapy-sensitive cell line; X–mice xenograft based on LC cell lines.
